# Supplementary material
Source: PubMed Central journal article supplement (PMC7612597)
Supplement: EMS144008-supplement-Supplementary_data.pdf [file EMS144008-supplement-Supplementary_data.pdf]

# **Covid-19 effects on ARTErial Stiffness and vascular AgeiNg: CARTESIAN study rationale and protocol**

Rosa Maria BRUNO, Bart SPRONCK, Bernhard HAMETNER, Alun HUGHES, Patrick LACOLLEY, Christopher C. MAYER, Maria Lorenza MUIESAN, Chakravarthi RAJKUMAR, Dimitrios TERENCE-PRINTZIOS, Thomas WEBER, Tine WILLUM HANSEN, Pierre BOUTOUYRIE, on behalf of the ARTERY Society

## **SUPPLEMENTAL DIGITAL CONTENT 1**

### **CORRESPONDING AUTHOR**

Rosa Maria Bruno, MD, PhD

INSERM U970 Team 7, Paris Cardiovascular Research Centre - PARCC

Université de Paris

AP-HP, Pharmacology Unit, Hôpital Européen Georges Pompidou

56 Rue Leblanc, 75015 Paris, France

Tel.: +33 1 5398 7967

Fax: +33 1 5609 3991

[rosa-maria.bruno@inserm.fr](mailto:rosa-maria.bruno@inserm.fr)

**Supplemental Table S1.** List of participating centres that have obtained Ethics Committee approval as of 10 November 2020

| <b>Centre</b>                                | <b>City</b>           | <b>Country</b> |
|----------------------------------------------|-----------------------|----------------|
| Wels-Grieskirchen Hospital                   | Wels                  | Austria        |
| Macquarie University                         | Sydney                | Australia      |
| InCor – Instituto do Coração                 | São Paulo             | Brazil         |
| Federal University of Goiás                  | Goiás                 | Brazil         |
| State University of Maringá                  | Maringá               | Brazil         |
| Faculty of Medicine of São José do Rio Preto | São José do Rio Preto | Brazil         |
| Hôpital du Sacré-Cœur de Montréal            | Montréal, QC          | Canada         |
| University Hospital of Québec                | Québec, QC            | Canada         |
| University of Split                          | Split                 | Croatia        |
| Cyprus University of Technology              | Limassol              | Cyprus         |
| University Hospital in Pilsen                | Pilsen                | Czech Republic |
| European Georges Pompidou Hospital           | Paris                 | France         |
| Rouen University Hospital                    | Rouen                 | France         |
| Lille University Hospital                    | Lille                 | France         |
| Nancy University Hospital                    | Nancy                 | France         |
| National & Kapodistrian University of Athens | Athens                | Greece         |
| Laiko General Hospital of Athens             | Athens                | Greece         |
| University of Brescia                        | Brescia               | Italy          |
| Terni University Hospital                    | Terni                 | Italy          |
| Sacro Cuore-Don Calabria Hospital            | Negrar                | Italy          |
| Sondrio Hospital                             | Sondrio               | Italy          |
| University of Catania                        | Catania               | Italy          |
| University of Turin                          | Turin                 | Italy          |
| Niguarda Ca' Granda Hospital                 | Milan                 | Italy          |
| University of Pisa                           | Pisa                  | Italy          |
| Azienda Sanitaria Universitaria Trieste      | Trieste               | Italy          |
| University of Guadalajara                    | Guadalajara           | Mexico         |
| University of Bergen                         | Bergen                | Norway         |
| University of Porto                          | Porto                 | Portugal       |
| Dokuz Eylül University                       | Izmir                 | Turkey         |
| Giresun University                           | Giresun               | Turkey         |
| University College London                    | London                | United Kingdom |
| University of Texas at El Paso               | El Paso, TX           | United States  |
